# Supplementary material
Source: PubMed Central journal article supplement (PMC7007364)
Supplement: NIHMS1542655-supplement-1.pdf [file NIHMS1542655-supplement-1.pdf]

**Supplementary Table 1.** Database of neural and behavioral recordings

| Monkey         | Age (years) | Array site | Implant date | # sessions | Range of days | Range since array implantation | Min. # of reaches/target |
|----------------|-------------|------------|--------------|------------|---------------|--------------------------------|--------------------------|
| M              | 6-7         | Right PMd  | 6/17/2013    | 17         | 508           | 231 - 739                      | 17                       |
|                |             | Right M1   |              | 18         | 508           | 231 - 739                      | 17                       |
| T              | 10          | Right PMd  | 7/9/2012     | 6          | 21            | 406 - 427                      | 17                       |
| C <sub>R</sub> | 6-7         | Right M1   | 6/15/2010    | 36         | 731           | 1206 - 1937                    | 12                       |
| C <sub>L</sub> | 8           | Left PMd   | 8/9/2016     | 14         | 42            | 31 - 73                        | 10                       |
|                |             | Left M1    |              | 14         | 42            | 31 - 73                        | 10                       |
| J              | 19          | Left M1    | 5/16/2015    | 12         | 71            | 266 - 337                      | 16                       |
| P              | 8           | Left S1    | 10/28/2015   | 6          | 28            | 16 - 44                        | 10                       |
| H              | 8           | Left S1    | 2/9/2016     | 14         | 44            | 623 - 667                      | 12                       |
